# Supplementary material for: MYC is Sufficient to Generate Mid-Life High-Grade Serous Ovarian and Uterine Serous Carcinomas in a p53-R270H Mouse Model
Source: PubMed Central journal article supplement (PMC11425777; doi:10.1158/2767-9764.crc-24-0144), 2024-09-26
Supplement: crc-24-0144_supplementary_figure_1_supps1.pdf [file crc-24-0144_supplementary_figure_1_supps1.pdf]

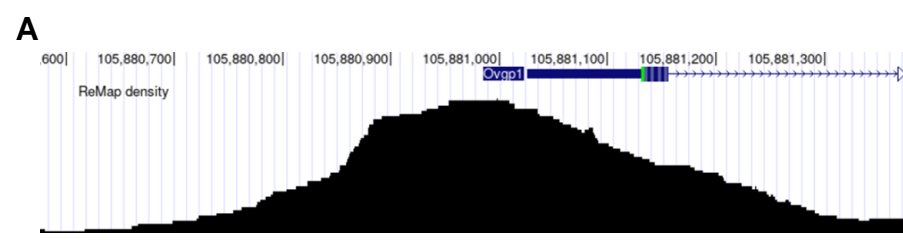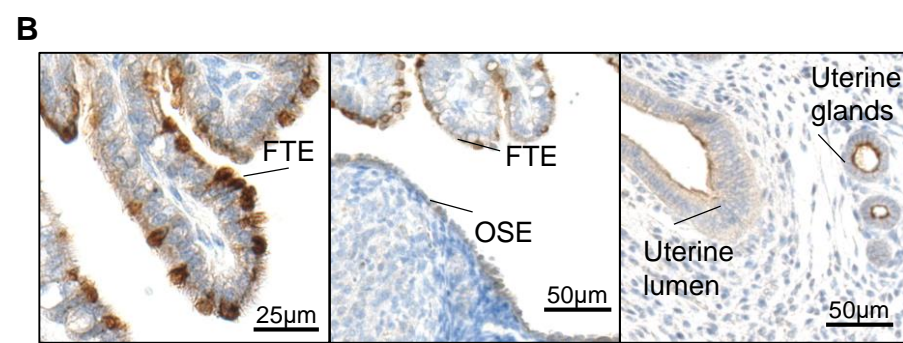

**Figure S1: *Ovgp1* transgene expression.** (A) UCSC Genome Browser display of the murine *Ovgp1* promoter with its regulatory peak, as annotated in the ReMap ChIP-seq database. (B) 3xHA tag transgene immunohistochemical staining at 10 weeks of age in an OvTrpMyc female.
