# Supplementary material for: MYC is Sufficient to Generate Mid-Life High-Grade Serous Ovarian and Uterine Serous Carcinomas in a p53-R270H Mouse Model
Source: PubMed Central journal article supplement (PMC11425777; doi:10.1158/2767-9764.crc-24-0144), 2024-09-26
Supplement: crc-24-0144_supplementary_figure_2_supps2.pdf [file crc-24-0144_supplementary_figure_2_supps2.pdf]

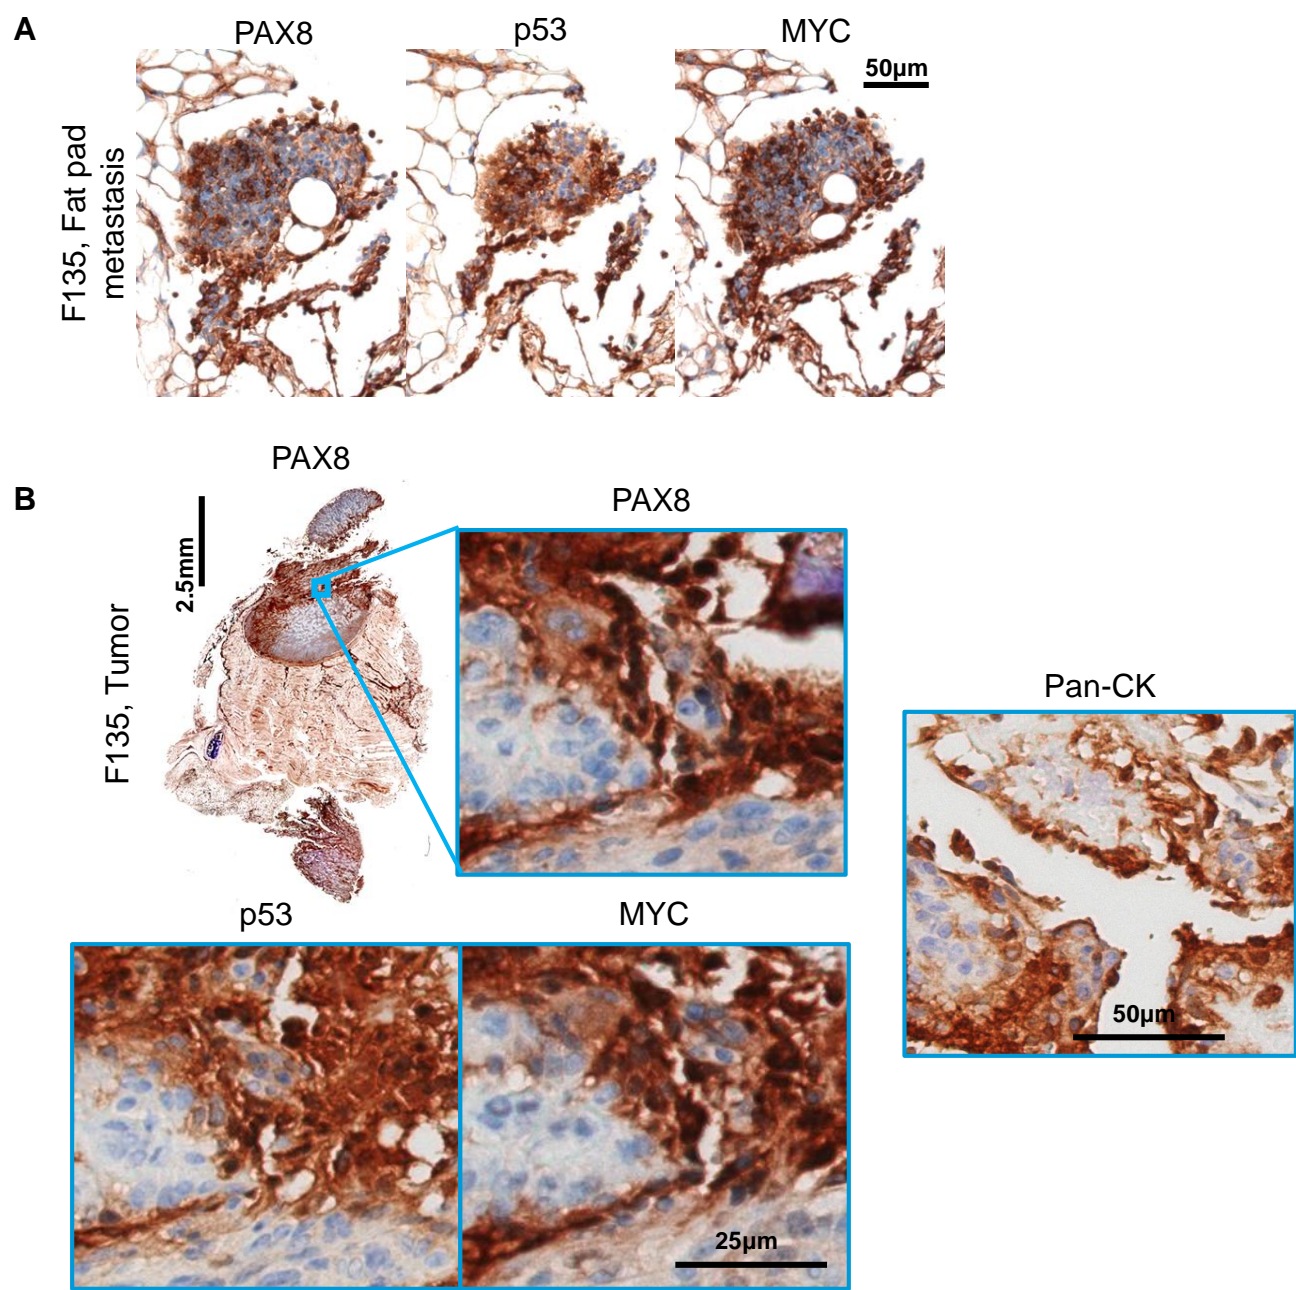

**Figure S2: Tumor immunohistochemistry from FTE affected mice.** (A) An ovarian fat pad metastatic nodule. (B) Intra-abdominal tumor dissected from an OvTrpMyc mouse with positive PAX8, p53, and MYC staining.
