# Supplementary material for: MYC is Sufficient to Generate Mid-Life High-Grade Serous Ovarian and Uterine Serous Carcinomas in a p53-R270H Mouse Model
Source: PubMed Central journal article supplement (PMC11425777; doi:10.1158/2767-9764.crc-24-0144), 2024-09-26
Supplement: crc-24-0144_supplementary_figure_5_supps5.pdf [file crc-24-0144_supplementary_figure_5_supps5.pdf]

**A**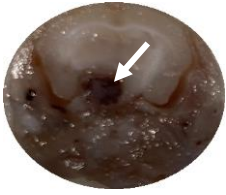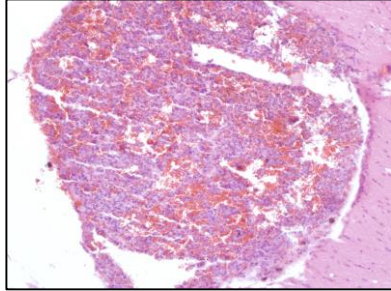**B**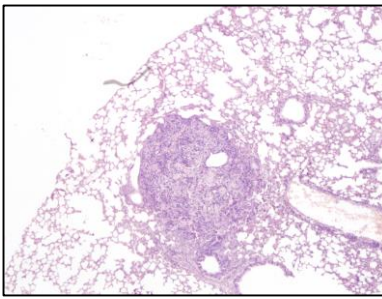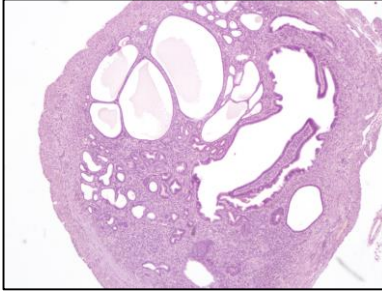

**Figure S5: Necropsy of mice lacking macroscopic disease.**

OvTrpMyc mice were evaluated by necropsy when macroscopic tumors were not immediately observed. **(A)** Dissected brain (top panel) and H&E section of brain tumor (bottom panel). **(B)** Lung metastasis (top panel) and a normal phenotype of some aged mice: cystic uterus (bottom panel).
