# Supplementary material for: MYC is Sufficient to Generate Mid-Life High-Grade Serous Ovarian and Uterine Serous Carcinomas in a p53-R270H Mouse Model
Source: PubMed Central journal article supplement (PMC11425777; doi:10.1158/2767-9764.crc-24-0144), 2024-09-26
Supplement: crc-24-0144_supplementary_figure_6_supps6.pdf [file crc-24-0144_supplementary_figure_6_supps6.pdf]

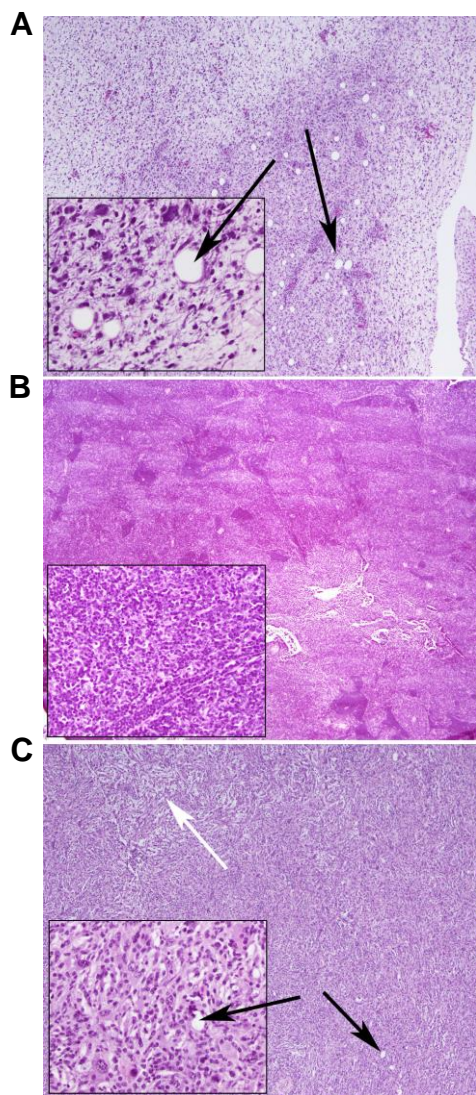

**Figure S6: Other malignancies.**

(A) Myxoid neoplasm with markedly pleomorphic cells with associated vacuoles, marked by the black arrows. (B) Small round blue cell malignancy with relatively uniform nuclei growing in a sheeted growth pattern. (C) Tumor characteristics include spindle cell malignancy with scattered giant cells, storiform architecture, marked by the white arrow. Moderately pleomorphic with scattered vacuoles, marked by black arrows.
