# Supplementary material for: MYC is Sufficient to Generate Mid-Life High-Grade Serous Ovarian and Uterine Serous Carcinomas in a p53-R270H Mouse Model
Source: PubMed Central journal article supplement (PMC11425777; doi:10.1158/2767-9764.crc-24-0144), 2024-09-26
Supplement: crc-24-0144_supplementary_figure_7_supps7.pdf [file crc-24-0144_supplementary_figure_7_supps7.pdf]

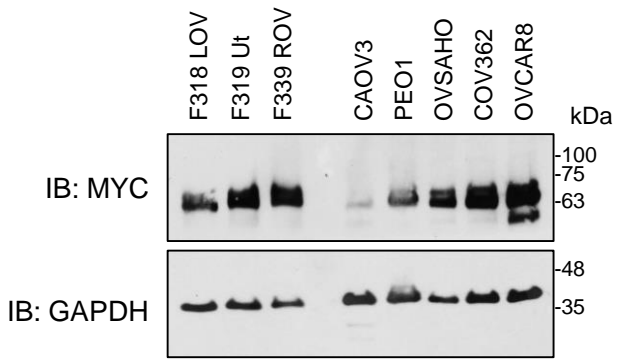

**Figure S7: MYC levels in syngeneic OvTrpMyc cell lines relative to human lines.** Western immunoblots (IB) of indicated cell line lysates.
