# Supplementary material for: MYC is Sufficient to Generate Mid-Life High-Grade Serous Ovarian and Uterine Serous Carcinomas in a p53-R270H Mouse Model
Source: PubMed Central journal article supplement (PMC11425777; doi:10.1158/2767-9764.crc-24-0144), 2024-09-26
Supplement: crc-24-0144_supplementary_table_1_suppst1.pdf [file crc-24-0144_supplementary_table_1_suppst1.pdf]

| Mouse ID | Genotype | Months | Euthanasia<br>criteria met | Tissue | p53 | MYC | PAX8 |
|----------|----------|--------|----------------------------|--------|-----|-----|------|
| F142     | WT       | 3      | N                          | OSE    | 0   | 0   | 0    |
| F142     | WT       | 3      | N                          | FTE    | 0   | 0   | NE   |
| F142     | WT       | 3      | N                          | ULE    | 0   | 0   | 0    |
| F28      | WT       | 12     | N                          | OSE    | 0   | 0   | 0    |
| F28      | WT       | 12     | N                          | FTE    | 0   | 0   | NE   |
| F28      | WT       | 12     | N                          | ULE    | 0   | 0   | 0    |
| FO111    | Het      | 3      | N                          | OSE    | 0   | 0   | 0    |
| FO111    | Het      | 3      | N                          | FTE    | 0   | 0   | NE   |
| FO111    | Het      | 3      | N                          | ULE    | 0   | 0   | 0    |
| FO112    | Het      | 3      | N                          | OSE    | 0   | 0   | 0    |
| FO112    | Het      | 3      | N                          | FTE    | 0   | 0   | NE   |
| FO112    | Het      | 3      | N                          | ULE    | 0   | 0   | 0    |
| FO113    | Het      | 3      | N                          | OSE    | 0   | 0   | 0    |
| FO113    | Het      | 3      | N                          | FTE    | 0   | 0   | NE   |
| FO113    | Het      | 3      | N                          | ULE    | 0   | 0   | 0    |
| FO86     | Het      | 6      | N                          | OSE    | 0   | 0   | 0    |
| FO86     | Het      | 6      | N                          | FTE    | 0   | 0   | NE   |
| FO86     | Het      | 6      | N                          | ULE    | 0   | 0   | 0    |
| FO67     | Het      | 9      | N                          | OSE    | 0   | 0   | 0    |
| FO67     | Het      | 9      | N                          | FTE    | 1   | 1   | NE   |
| FO67     | Het      | 9      | N                          | ULE    | 0   | 0   | 0    |

**Supplementary Table 1. Semi-quantitative estimates of immunohistochemical staining in healthy mice.**

Tissue acronyms: fallopian tube epithelium (FTE), ovarian surface epithelium (OSE), uterine luminal epithelium (ULE).

p53, MYC, and PAX8 stains were enumerated 0: no staining or scattered cells only,

1: clustered cells with predominantly cytoplasmic staining, 2: clustered cells with nuclear staining observed,

3: multiple clusters of nuclear positive cells, 4: majority of an area affected by positive staining.

“-” indicates tissue was not available or otherwise not evaluable on this slide.

“NE” indicates PAX8 is unevaluable by this scoring on FTE due to positivity in normal epithelium.
